# Supplementary material for: Peer mentorship to improve self-management of hip and knee osteoarthritis: a randomised feasibility trial
Source: BMJ Open. 2021 Jul 21;11(7):e045389. doi: 10.1136/bmjopen-2020-045389 (PMC8296761; doi:10.1136/bmjopen-2020-045389)
Supplement: Supplementary data [file bmjopen-2020-045389supp001.pdf]

## Supplementary Material

**Peer mentorship to improve self-management of osteoarthritis:  
A randomised feasibility trial – Supplementary Material**

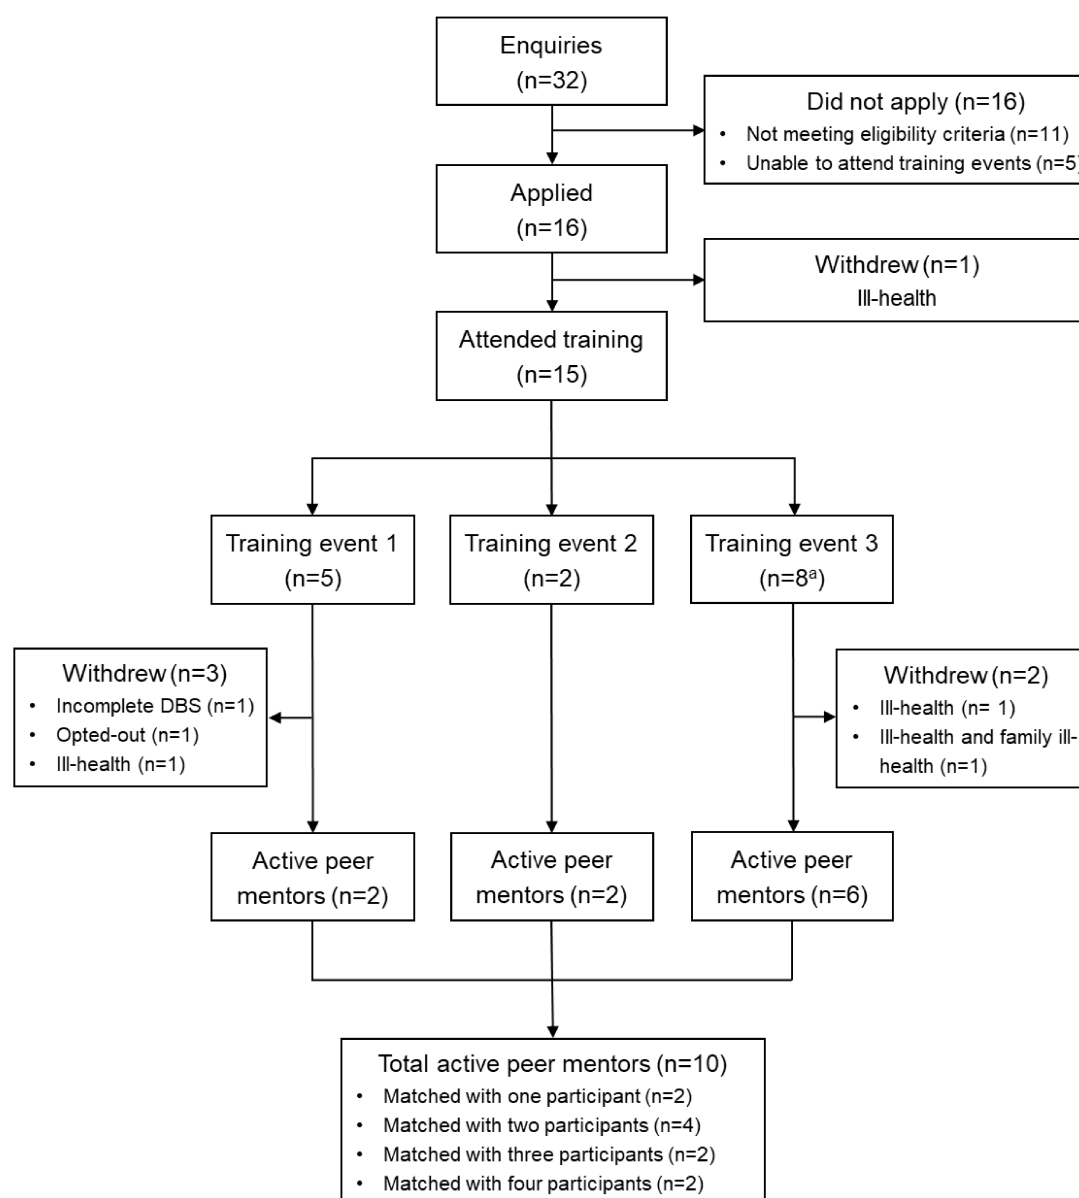

**Supplementary Figure 1: Peer mentor flow diagram**

<sup>a</sup> One trained peer mentor who attended Training event 1 also attended Training event 3 as refresher training.

DBS, Enhanced Disclosure and Barring Service check

## Supplementary Material

**Supplementary Table 1: CONSORT 2010 checklist of information to include when reporting a pilot or feasibility randomised trial in a journal or conference abstract**

| Item               | Description                                                                                                 | Reported on line number |
|--------------------|-------------------------------------------------------------------------------------------------------------|-------------------------|
| Title              | Identification of study as randomised pilot or feasibility trial                                            | 2                       |
| Authors            | Contact details for the corresponding author                                                                | 15-17                   |
| Trial design       | Description of pilot trial design (eg, parallel, cluster)                                                   | 28                      |
| <b>Methods</b>     |                                                                                                             |                         |
| Participants       | Eligibility criteria for participants and the settings where the pilot trial was conducted                  | 29-30, 33               |
| Interventions      | Interventions intended for each group                                                                       | 32-35                   |
| Objective          | Specific objectives of the pilot trial                                                                      | 25-27                   |
| Outcome            | Prespecified assessment or measurement to address the pilot trial objectives                                | 36-40                   |
| Randomisation      | How participants were allocated to interventions                                                            | 32                      |
| Blinding (masking) | Whether or not participants, care givers, and those assessing the outcomes were blinded to group assignment | 28                      |
| <b>Results</b>     |                                                                                                             |                         |
| Numbers randomised | Number of participants screened and randomised to each group for the pilot trial objectives                 | 41-42                   |
| Recruitment        | Trial status                                                                                                | N/A <sup>a</sup>        |
| Numbers analysed   | Number of participants analysed in each group for the pilot objectives                                      | 42-45                   |
| Outcome            | Results for the pilot objectives, including any expressions of uncertainty                                  | 41-48                   |
| Harms              | Important adverse events or side effects                                                                    | 45-46                   |
| Conclusions        | General interpretation of the results of pilot trial and their implications for the future definitive trial | 49-52                   |
| Trial registration | Registration number for pilot trial and name of trial register                                              | 53                      |
| Funding            | Source of funding for pilot trial                                                                           | 54                      |

## Supplementary Material

N/A, Not applicable

<sup>a</sup> Not applicable as item is only applicable to conference abstracts.

Checklist from: Eldridge SM, Chan CL, Campbell MJ, et al. CONSORT 2010 statement: extension to randomised pilot and feasibility trials. *BMJ* 2016;355:i5239.

## Supplementary Material

**Supplementary Table 2: CONSORT 2010 checklist of information to include when reporting a pilot or feasibility trial**

| Section/Topic             | Item No | Checklist item                                                                                                                        | Reported on page No                       |
|---------------------------|---------|---------------------------------------------------------------------------------------------------------------------------------------|-------------------------------------------|
| <b>Title and abstract</b> |         |                                                                                                                                       |                                           |
|                           | 1a      | Identification as a pilot or feasibility randomised trial in the title                                                                | 1                                         |
|                           | 1b      | Structured summary of pilot trial design, methods, results, and conclusions                                                           | 2-3                                       |
| <b>Introduction</b>       |         |                                                                                                                                       |                                           |
| Background and objectives | 2a      | Scientific background and explanation of rationale for future definitive trial, and reasons for randomised pilot trial                | 4-5                                       |
|                           | 2b      | Specific objectives or research questions for pilot trial                                                                             | 5                                         |
| <b>Methods</b>            |         |                                                                                                                                       |                                           |
| Trial design              | 3a      | Description of pilot trial design (such as parallel, factorial) including allocation ratio                                            | 5                                         |
|                           | 3b      | Important changes to methods after pilot trial commencement (such as eligibility criteria), with reasons                              | 13                                        |
| Participants              | 4a      | Eligibility criteria for participants                                                                                                 | 6                                         |
|                           | 4b      | Settings and locations where the data were collected                                                                                  | 6, 11, 15                                 |
|                           | 4c      | How participants were identified and consented                                                                                        | 6                                         |
| Interventions             | 5       | The interventions for each group with sufficient details to allow replication, including how and when they were actually administered | 7-13<br>Figure 1<br>Supplementary table 3 |

## Supplementary Material

|                                  |     |                                                                                                                                                                                             |           |
|----------------------------------|-----|---------------------------------------------------------------------------------------------------------------------------------------------------------------------------------------------|-----------|
| Outcomes                         | 6a  | Completely defined prespecified assessments or measurements to address each pilot trial objective specified in 2b, including how and when they were assessed                                | 13-17     |
|                                  | 6b  | Any changes to pilot trial assessments or measurements after the pilot trial commenced, with reasons                                                                                        | N/A       |
|                                  | 6c  | If applicable, prespecified criteria used to judge whether, or how, to proceed with future definitive trial                                                                                 | 14        |
| Sample size                      | 7a  | Rationale for numbers in the pilot trial                                                                                                                                                    | 7         |
|                                  | 7b  | When applicable, explanation of any interim analyses and stopping guidelines                                                                                                                | N/A       |
| Randomisation:                   |     |                                                                                                                                                                                             |           |
| Sequence generation              | 8a  | Method used to generate the random allocation sequence                                                                                                                                      | 7         |
|                                  | 8b  | Type of randomisation(s); details of any restriction (such as blocking and block size)                                                                                                      | 7         |
| Allocation concealment mechanism | 9   | Mechanism used to implement the random allocation sequence (such as sequentially numbered containers), describing any steps taken to conceal the sequence until interventions were assigned | 7         |
| Implementation                   | 10  | Who generated the random allocation sequence, who enrolled participants, and who assigned participants to interventions                                                                     | 6-7       |
| Blinding                         | 11a | If done, who was blinded after assignment to interventions (for example, participants, care providers, those assessing outcomes) and how                                                    | N/A       |
|                                  | 11b | If relevant, description of the similarity of interventions                                                                                                                                 | N/A       |
| Statistical methods              | 12  | Methods used to address each pilot trial objective whether qualitative or quantitative                                                                                                      | 14, 17-18 |
| <b>Results</b>                   |     |                                                                                                                                                                                             |           |

## Supplementary Material

|                                                      |     |                                                                                                                                                                                       |                             |
|------------------------------------------------------|-----|---------------------------------------------------------------------------------------------------------------------------------------------------------------------------------------|-----------------------------|
| Participant flow (a diagram is strongly recommended) | 13a | For each group, the numbers of participants who were approached and/or assessed for eligibility, randomly assigned, received intended treatment, and were assessed for each objective | 19-28<br>Figure 2           |
|                                                      | 13b | For each group, losses and exclusions after randomisation, together with reasons                                                                                                      | 20<br>Figure 2              |
| Recruitment                                          | 14a | Dates defining the periods of recruitment and follow-up                                                                                                                               | 5, 19                       |
|                                                      | 14b | Why the pilot trial ended or was stopped                                                                                                                                              | N/A                         |
| Baseline data                                        | 15  | A table showing baseline demographic and clinical characteristics for each group                                                                                                      | 23<br>Supplementary table 7 |
| Numbers analysed                                     | 16  | For each objective, number of participants (denominator) included in each analysis. If relevant, these numbers should be by randomised group                                          | 19-28                       |
| Outcomes and estimation                              | 17  | For each objective, results including expressions of uncertainty (such as 95% confidence interval) for any estimates. If relevant, these results should be by randomised group        | 19-28                       |
| Ancillary analyses                                   | 18  | Results of any other analyses performed that could be used to inform the future definitive trial                                                                                      | N/A                         |
| Harms                                                | 19  | All important harms or unintended effects in each group                                                                                                                               | N/A                         |
|                                                      | 19a | If relevant, other important unintended consequences                                                                                                                                  | N/A                         |
| <b>Discussion</b>                                    |     |                                                                                                                                                                                       |                             |
| Limitations                                          | 20  | Pilot trial limitations, addressing sources of potential bias and remaining uncertainty about feasibility                                                                             | 29-33                       |
| Generalisability                                     | 21  | Generalisability (applicability) of pilot trial methods and findings to future definitive trial and other studies                                                                     | 32                          |

## Supplementary Material

|                          |     |                                                                                                                                                     |              |
|--------------------------|-----|-----------------------------------------------------------------------------------------------------------------------------------------------------|--------------|
| Interpretation           | 22  | Interpretation consistent with pilot trial objectives and findings, balancing potential benefits and harms, and considering other relevant evidence | 28-33        |
|                          | 22a | Implications for progression from pilot to future definitive trial, including any proposed amendments                                               | 29-30, 32-33 |
| <b>Other information</b> |     |                                                                                                                                                     |              |
| Registration             | 23  | Registration number for pilot trial and name of trial registry                                                                                      | 5            |
| Protocol                 | 24  | Where the pilot trial protocol can be accessed, if available                                                                                        | 35           |
| Funding                  | 25  | Sources of funding and other support (such as supply of drugs), role of funders                                                                     | 34           |
|                          | 26  | Ethical approval or approval by research review committee, confirmed with reference number                                                          | 5, 34        |

Checklist from: Eldridge SM, Chan CL, Campbell MJ, et al. CONSORT 2010 statement: extension to randomised pilot and feasibility trials. *BMJ* 2016;355:i5239.

## Supplementary Material

**Supplementary Table 3: Key behaviour change techniques included in the osteoarthritis peer mentorship intervention**

| <b>Behaviour change technique<sup>a</sup></b>   | <b>Example of implementation</b>                                                                                                               |
|-------------------------------------------------|------------------------------------------------------------------------------------------------------------------------------------------------|
| 1.1 Goal setting (behaviour)                    | The peer mentor supports the participant to set a goal of meeting a friend for coffee twice weekly.                                            |
| 1.2 Problem solving                             | The peer mentor supports the participant to analyse barriers to pacing their activities and identify strategies to help overcome the barriers. |
| 1.4 Action planning                             | The peer mentor supports the participant to plan when and where they will go cycling and how long their cycle rides will last.                 |
| 1.5 Review behaviour goal(s)                    | The peer mentor and participant review the participant's goal of not drinking any caffeinated drinks after 5.00pm and adapt it if necessary.   |
| 2.2 Feedback on behaviour                       | The peer mentor provides the participant with feedback on their strengthening exercise technique during their peer mentorship session.         |
| 3.1 Social support (unspecified)                | The peer mentor provides information about a local walking football group.                                                                     |
| 3.3 Social support (emotional)                  | The peer mentor provides emotional support to help the participant to go for a walk even though they feel anxious about falling.               |
| 4.1 Instruction on how to perform the behaviour | The peer mentor advises the participant how to perform a relaxation technique.                                                                 |
| 5.1 Information about health consequences       | The peer mentor explains that losing weight can help improve symptoms of osteoarthritis.                                                       |
| 5.6 Information about emotional consequences    | The peer mentor explains that using conscious breathing techniques can help people feel calmer.                                                |
| 6.1 Demonstration of the behaviour              | The peer mentor demonstrates how to perform chair based exercises.                                                                             |
| 6.2 Social comparison                           | The peer mentor draws attention to how they are able to do yoga despite their osteoarthritis.                                                  |
| 8.1 Behavioural practice/rehearsal              | The peer mentor prompts the participant to practice being assertive in preparation for their doctor's appointment.                             |
| 8.3 Habit formation                             | The peer mentor prompts the participant to carry out an exercise routine in their bedroom after they have had a shower each morning.           |

## Supplementary Material

|                                         |                                                                                                                                                    |
|-----------------------------------------|----------------------------------------------------------------------------------------------------------------------------------------------------|
| 8.7 Graded tasks                        | The peer mentor supports the participant to swim 20 lengths by advising them to start with 10 lengths and then add an extra two lengths each week. |
| 9.1 Credible source                     | The peer mentor provides communication in favour of eating five portions of fruit and vegetables per day.                                          |
| 10.4 Social reward                      | The peer mentor praises the participant for progressing towards their goal of getting up at 8.30am each morning.                                   |
| 15.1 Verbal persuasion about capability | The peer mentor tells the participant that they can do leg strengthening exercises safely despite their osteoarthritis.                            |

<sup>a</sup> Behaviour change techniques are coded using the Behaviour Change Technique Taxonomy version 1 from: Michie S, Richardson M, Johnston M, et al. The Behavior Change Technique Taxonomy (v1) of 93 hierarchically clustered techniques: building an international consensus for the reporting of behavior change interventions. *Ann Behav Med* 2013 Aug;46(1):81-95. doi: 10.1007/s12160-013-9486-6.

Only key behaviour change techniques are listed. Peer mentors could incorporate additional behaviour change techniques as appropriate to the participant's individual needs and goals.

## Supplementary Material

**Supplementary Table 4: Overview of areas covered during the peer mentor training event**

| Day 1                                                                                                                                                                                                                                                                                                      | Day 2                                                                                                                                                                                                                                                                                                               |
|------------------------------------------------------------------------------------------------------------------------------------------------------------------------------------------------------------------------------------------------------------------------------------------------------------|---------------------------------------------------------------------------------------------------------------------------------------------------------------------------------------------------------------------------------------------------------------------------------------------------------------------|
| <ul style="list-style-type: none"><li>• Overview of the trial and peer mentor role</li><li>• Osteoarthritis key facts and self-management topics</li><li>• Goal setting</li><li>• Pacing</li><li>• Educational resource pack review</li><li>• Exercise</li><li>• Pain management</li><li>• Sleep</li></ul> | <ul style="list-style-type: none"><li>• Review of day 1</li><li>• Communication</li><li>• Professional boundaries</li><li>• Mentoring in practice (including safeguarding, disclosures and confidentiality)</li><li>• Visit and recording procedures</li><li>• Trial data collection</li><li>• Next steps</li></ul> |

## Supplementary Material

**Supplementary Table 5: Estimated costs of delivering the two day peer mentor training event to five peer mentors**

| <b>Staff costs<sup>a</sup></b>  |                          |                 |                |
|---------------------------------|--------------------------|-----------------|----------------|
|                                 | Hourly rate <sup>b</sup> | Hours per event | Cost per event |
| Research Fellow (Grade 7)       | £32.23                   | 7.5             | £241.73        |
| Research Associate (Grade 6)    | £26.09                   | 15              | £391.35        |
| Volunteer Coordinator (Grade 5) | £21.79                   | 15              | £326.85        |
| Total staff costs               |                          |                 | £959.93        |
| <b>Peer mentor costs</b>        |                          |                 |                |
|                                 | Cost per peer mentor     |                 | Cost per event |
| Refreshments                    | £18.00                   |                 | £90.00         |
| Notebook                        | £2.48                    |                 | £12.40         |
| Ring binder                     | £2.00                    |                 | £10.00         |
| Plastic wallets                 | £0.67                    |                 | £3.33          |
| Printing                        | £10.50                   |                 | £52.50         |
| Name badge                      | £0.14                    |                 | £0.68          |
| Travel expenses                 | £13.14                   |                 | £65.70         |
| Total peer mentor costs         | £46.92                   |                 | £234.62        |
| <b>Overall costs</b>            |                          |                 |                |
|                                 | Cost per peer mentor     |                 | Cost per event |
| Overall costs                   | £238.91                  |                 | £1,194.54      |

<sup>a</sup> Staff costs were based on the events run by the trial team members.

<sup>b</sup> Includes staff salary, National Insurance contributions and pension contributions, but does not include estates costs or indirect costs.

## Supplementary Material

**Supplementary Table 6: Estimated costs of delivering the OA peer mentorship intervention to one participant**

| <b>Volunteer Coordinator costs (Grade 5 hourly rate £21.79<sup>a</sup>)</b> |                    |                                |
|-----------------------------------------------------------------------------|--------------------|--------------------------------|
|                                                                             | Per single session | Per 5.79 sessions <sup>b</sup> |
| Hours spent supporting mentorship sessions (0.5 hours per session)          | £10.90             | £63.10                         |
| Additional hours spent on matching, initial session and closure (4 hours)   | £15.05             | £87.16                         |
| Travel expenses for initial session                                         | £0.81              | £4.72                          |
| Total Volunteer Coordinator costs                                           | £26.76             | £154.98                        |
| <b>Peer mentor costs</b>                                                    |                    |                                |
|                                                                             | Per single session | Per 5.79 sessions <sup>b</sup> |
| Honorarium                                                                  | £15                | £86.88                         |
| Travel expenses                                                             | £5.53              | £32.01                         |
| Total peer mentor costs                                                     | £20.53             | £118.89                        |
| <b>Overall costs</b>                                                        |                    |                                |
|                                                                             | Per single session | Per 5.79 sessions <sup>b</sup> |
| Overall costs                                                               | £47.29             | £273.86                        |

<sup>a</sup> Includes staff salary, National Insurance contributions and pension contributions, but does not include estates costs or indirect costs.

<sup>b</sup> 5.79 was the mean number of mentorship sessions received by participants.

## Supplementary Material

**Supplementary Table 7: Additional participant baseline characteristics**

| Characteristics                                                                  | Intervention<br>n=24 | Control<br>n=25 |
|----------------------------------------------------------------------------------|----------------------|-----------------|
| <b>Marital status, n (%)</b>                                                     |                      |                 |
| Married                                                                          | 12 (50.0)            | 17 (68.0)       |
| Divorced                                                                         | 6 (25.0)             | 2 (8.0)         |
| Living together                                                                  | 0 (0.0)              | 1 (4.0)         |
| Widowed                                                                          | 5 (20.8)             | 3 (12.0)        |
| Single                                                                           | 1 (4.2)              | 2 (8.0)         |
| <b>Current smokers, n (%)</b>                                                    | 1 (4.2)              | 2 (8.0)         |
| <b>Areas affected by arthritis, n (%)</b>                                        |                      |                 |
| Single hip                                                                       | 0 (0.0)              | 0 (0.0)         |
| Both hips                                                                        | 2 (8.3)              | 4 (16.0)        |
| Single knee                                                                      | 2 (8.3)              | 3 (12.0)        |
| Both knees                                                                       | 8 (33.3)             | 9 (36.0)        |
| Single hip and single knee                                                       | 2 (8.3)              | 3 (12.0)        |
| Both hips and one knee                                                           | 2 (8.3)              | 1 (4.0)         |
| Single hip and both knees                                                        | 5 (20.8)             | 2 (8.0)         |
| Both hips and both knees                                                         | 3 (12.5)             | 3 (12.0)        |
| <b>Areas affected by joint pain for &gt; 6 weeks in the last 3 months, n (%)</b> |                      |                 |
| Neck                                                                             | 7 (29.2)             | 6 (24.0)        |
| Shoulder (right)                                                                 | 7 (29.2)             | 6 (24.0)        |
| Shoulder (left)                                                                  | 7 (29.2)             | 7 (28.0)        |
| Elbow (right)                                                                    | 0 (0.0)              | 2 (8.0)         |
| Elbow (left)                                                                     | 0 (0.0)              | 2 (8.0)         |
| Hand (right)                                                                     | 9 (37.5)             | 6 (24.0)        |
| Hand (left)                                                                      | 9 (37.5)             | 5 (20.0)        |
| Back                                                                             | 6 (25.0)             | 11 (44.0)       |
| Hip (right)                                                                      | 10 (41.7)            | 10 (40.0)       |
| Hip (left)                                                                       | 10 (41.7)            | 10 (40.0)       |
| Knee (right)                                                                     | 19 (79.2)            | 16 (64.0)       |
| Knee (left)                                                                      | 19 (79.2)            | 20 (80.0)       |

## Supplementary Material

|                                                                                  |           |            |
|----------------------------------------------------------------------------------|-----------|------------|
| Foot (right)                                                                     | 5 (20.8)  | 4 (16.0)   |
| Foot (left)                                                                      | 4 (16.7)  | 5 (16.0)   |
| <b>Duration of pain in years, mean (SD)</b>                                      | 4.7 (5.2) | 5.3 (6.2)  |
| <b>Currently suffering from pain, n (%)</b>                                      | 23 (95.8) | 25 (100.0) |
| <b>Frequency of pain<sup>a</sup>, n (%)</b>                                      |           |            |
| Always                                                                           | 7 (30.4)  | 11 (44.0)  |
| Often present                                                                    | 5 (21.7)  | 9 (36.0)   |
| Sometimes present                                                                | 10 (43.5) | 3 (20.0)   |
| Present very little                                                              | 1 (4.4)   | 0 (0.0)    |
| <b>Previous hip replacement, n (%)</b>                                           | 1 (4.2)   | 1 (4)      |
| <b>Previous knee replacement(s), n (%)</b>                                       | 1 (4.2)   | 2 (8)      |
| <b>Walking aid use, n (%)</b>                                                    | 8 (33.3)  | 7 (28.0)   |
| <b>Currently using medication for pain or other symptoms of arthritis, n (%)</b> | 20 (83.3) | 21 (84.0)  |
| <b>Currently using strong opioids, n, (%)</b>                                    | 1 (4.2)   | 0 (0.0)    |
| <b>Currently using over-the-counter NSAIDS, n (%)</b>                            | 4 (16.7)  | 6 (24.0)   |

NSAIDS, non-steroidal anti-inflammatory drugs; SD, standard deviation.

<sup>a</sup> Frequency of pain intervention group n=23 because one participant reported they were not currently suffering from pain.

## Supplementary Material

**Supplementary Table 8: Mean resource use and mean difference between groups for the 8 week and 6 month questionnaires combined**

|                                         | Intervention<br>group mean<br>use (n=22) | Control<br>group mean<br>use (n=24) | Mean difference (95%<br>Confidence Interval) |
|-----------------------------------------|------------------------------------------|-------------------------------------|----------------------------------------------|
| Inpatient length of stay (nights)       | 0.05                                     | 0.96                                | -0.91 (-1.78 to -0.04)                       |
| Number of Outpatient appointments       | 3.05                                     | 2.92                                | 0.13 (-1.87 to 2.13)                         |
| Number GP appointments (surgery)        | 2.73                                     | 2.42                                | 0.31 (-1.47 to 2.09)                         |
| Number of GP visits (home)              | 0.00                                     | 0.17                                | -0.17 (-0.52 to 0.18)                        |
| Number of GP calls (telephone)          | 0.59                                     | 0.67                                | -0.08 (-0.70 to 0.55)                        |
| Number of GP Practice Nurse visits      | 1.64                                     | 0.71                                | 0.93 (0.15 to 1.71)                          |
| Number of District Nurse visits         | 0.00                                     | 0.00                                | 0.00                                         |
| Number of Occupational Therapist visits | 0.09                                     | 0.21                                | -0.12 (-0.47 to 0.24)                        |
| Number of Physiotherapist visits        | 1.36                                     | 1.96                                | -0.59 (-2.74 to 1.55)                        |
| Number of Chiropodist visits            | 0.64                                     | 0.75                                | -0.11 (-0.86 to 0.63)                        |
| Number of Pharmacist visits             | 2.27                                     | 1.67                                | 0.61 (-1.04 to 2.25)                         |
| Number of NHS Direct calls              | 0.18                                     | 0.13                                | 0.06 (-0.28 to 0.39)                         |
| Number of Walk-in Centre visits         | 0.41                                     | 0.13                                | 0.28 (-0.43 to 1.00)                         |
| Number of Counsellor visits             | 0.09                                     | 0.08                                | 0.01 (-0.24 to 0.26)                         |
